# Supplementary material for: Lysosomal protein turnover contributes to the acquisition of TGFβ-1 induced invasive properties of mammary cancer cells
Source: Springer Nature journal article supplement (doi:10.1186/s12943-015-0313-5), 2015-02-15
Supplement: MOESM3 [file 9762972]

- Supplementary Information Table S1 -

Proteins less abundant upon TGFβ-1 treatment

| Protein name                                                  | Protein ID | Gene name | E1                                 |                                           | E2                                 |                                           |
|---------------------------------------------------------------|------------|-----------|------------------------------------|-------------------------------------------|------------------------------------|-------------------------------------------|
|                                                               |            |           | log <sub>2</sub> FC (TGFβ-1/untr.) | log <sub>2</sub> FC (TGFβ-1 /TGFβ-1+E64d) | log <sub>2</sub> FC (TGFβ-1/untr.) | log <sub>2</sub> FC (TGFβ-1 /TGFβ-1+E64d) |
| Sodium-coupled monocarboxylate transporter 1                  | Q8BYF6     | Slc5a8    | -2,75                              | 0,44                                      | -2,67                              | 0,46                                      |
| Interferon-induced very large GTPase 1                        | F8WJ19     | Gvin1     | -2,73                              | -0,28                                     | -2,20                              | -0,38                                     |
| Alpha-2-macroglobulin                                         | D3YW52     | Pzp       | -2,26                              | -0,35                                     | -2,81                              | 0,30                                      |
| Interleukin-1 receptor antagonist protein                     | P25085     | Il1rn     | -2,12                              | -0,10                                     | -2,93                              | 0,15                                      |
| Structural maintenance of chromosomes protein                 | E9Q1E9     | Smc2      | -2,02                              | 0,15                                      | -1,88                              | 1,27                                      |
| DNA replication licensing factor MCM4                         | P49717     | Mcm4      | -1,96                              | 0,28                                      | -0,85                              | 0,33                                      |
| Cyclin-dependent kinase 1                                     | P11440     | Cdk1      | -1,87                              | -0,35                                     | -1,96                              | 0,37                                      |
| DNA replication licensing factor MCM6                         | P97311     | Mcm6      | -1,73                              | 0,06                                      | -1,53                              | -0,05                                     |
| DNA replication licensing factor MCM2                         | P97310     | Mcm2      | -1,68                              | -0,04                                     | -1,86                              | -0,01                                     |
| High mobility group protein B2                                | P30681     | Hmgb2     | -1,66                              | -0,01                                     | -1,56                              | -0,20                                     |
| DNA replication licensing factor MCM7                         | Q61881     | Mcm7      | -1,64                              | 0,02                                      | -2,24                              | -0,19                                     |
| Proliferating cell nuclear antigen                            | P17918     | Pcna      | -1,62                              | -0,10                                     | -1,52                              | 0,34                                      |
| DNA (cytosine-5)-methyltransferase 1                          | P13864     | Dnmt1     | -1,45                              | -0,10                                     | -1,49                              | 0,43                                      |
| Stathmin                                                      | P54227     | Stmn1     | -1,41                              | 0,18                                      | -1,83                              | 0,17                                      |
| Periplakin                                                    | Q9R269     | Ppl       | -1,41                              | 0,16                                      | -1,63                              | 0,00                                      |
| Vacuolar protein sorting-associated protein 28 homolog        | Q9D1C8     | Vps28     | -1,40                              | 1,10                                      | -1,22                              | -0,29                                     |
| Galectin-3                                                    | P16110     | Lgals3    | -1,38                              | 0,84                                      | -2,29                              | 1,68                                      |
| Acidic leucine-rich nuclear phosphoprotein 32 family member E | P97822     | Anp32e    | -1,31                              | 0,15                                      | -1,20                              | 0,03                                      |
| Claudin-7                                                     | Q9Z261     | Cldn7     | -1,26                              | 0,53                                      | -0,74                              | -0,12                                     |
| Metalloproteinase inhibitor 3                                 | P39876     | Timp3     | -1,26                              | 0,26                                      | -1,09                              | 0,70                                      |
| Plasminogen activator inhibitor 2, macrophage                 | P12388     | Serpinb2  | -1,21                              | -0,01                                     | -1,62                              | 0,43                                      |
| UPF0160 protein MYG1, mitochondrial                           | Q9JK81     | Myg1      | -1,21                              | 0,27                                      | -1,07                              | 0,15                                      |
| Epiplakin                                                     | Q8R0W0     | Eppk1     | -1,20                              | -0,03                                     | -1,54                              | 0,16                                      |
| Small subunit processome component 20 homolog                 | E9QK83     | Utp20     | -1,18                              | -0,10                                     | -1,48                              | 0,39                                      |
| Cytoplasmic aconitate hydratase                               | Q8VDC3     | Aco1      | -1,12                              | 0,31                                      | -1,21                              | 0,26                                      |
| Bifunctional 3-phosphoadenosine 5-phosphosulfate synthase 1   | Q60967     | Papss1    | -1,06                              | 0,11                                      | -1,21                              | 0,10                                      |
| E3 ubiquitin-protein ligase RNF213                            | E9Q555     | Rnf213    | -1,06                              | 0,29                                      | -1,31                              | 0,30                                      |
| 40S ribosomal protein S26                                     | P62855     | Rps26     | -1,06                              | -0,37                                     | -0,65                              | -0,24                                     |
| Histone H1.3;Histone H1.2                                     | P43277     | Hist1h1d  | -1,05                              | 0,05                                      | -0,67                              | -0,05                                     |
| Protein-glutamine gamma-glutamyltransferase 2                 | P21981     | Tgm2      | -1,03                              | -0,13                                     | -1,14                              | 0,04                                      |
| Glutathione S-transferase A4                                  | P24472     | Gsta4     | -0,99                              | 0,10                                      | -1,58                              | 0,19                                      |
| 60S ribosomal protein L35                                     | Q6ZWV7     | Rpl35     | -0,98                              | -0,08                                     | -0,71                              | 0,08                                      |

- Supplementary Information Table S1 -

| Protein name                                                               | Protein ID | Gene name | E1                    |                               | E2                    |                               |
|----------------------------------------------------------------------------|------------|-----------|-----------------------|-------------------------------|-----------------------|-------------------------------|
|                                                                            |            |           | log2FC (TGFB-1/untr.) | log2FC (TGFB-1 /TGFB-1+E64d)) | log2FC (TGFB-1/untr.) | log2FC (TGFB-1 /TGFB-1+E64d)) |
| Acetyl-CoA carboxylase 1                                                   | E9PUB1     | Acaca     | -0,98                 | 0,38                          | -1,18                 | 0,59                          |
| p21-activated protein kinase-interacting protein 1                         | Q9DCE5     | Pak1ip1   | -0,97                 | 0,17                          | -0,88                 | -0,35                         |
| Deoxyuridine triphosphatase, isoform CRA_b                                 | Q8VCG1     | Dut       | -0,95                 | 0,03                          | -0,81                 | 0,08                          |
| Aminoacyl tRNA synthase complex-interacting multifunctional protein 2      | Q8R010     | Aimp2     | -0,91                 | 0,42                          | -0,73                 | 0,36                          |
| Acyl-CoA-binding protein                                                   | F6ZM12     | Dbi       | -0,91                 | 0,25                          | -1,17                 | 0,51                          |
| Ceruloplasmin                                                              | E9PZD8     | Cp        | -0,88                 | 0,37                          | -0,88                 | 0,41                          |
| m7GpppX diphosphatase                                                      | Q9DAR7     | Dcps      | -0,88                 | -0,10                         | -1,04                 | 0,03                          |
| Proteasome assembly chaperone 3                                            | Q9CZH3     | Psmg3     | -0,88                 | 0,23                          | -0,89                 | 0,25                          |
| Basic leucine zipper and W2 domain-containing protein 2                    | Q91VK1     | Bzw2      | -0,88                 | -0,52                         | -0,80                 | -0,08                         |
| UTP--glucose-1-phosphate uridylyltransferase                               | Q91ZJ5     | Ugp2      | -0,87                 | 0,31                          | -1,39                 | 0,73                          |
| Atp2b1 protein                                                             | Q05CJ5     | Atp2b1    | -0,87                 | 0,08                          | -1,00                 | -0,04                         |
| Integrin alpha-6;Integrin alpha-6 heavy chain;Integrin alpha-6 light chain | Q61739     | Itga6     | -0,86                 | -0,06                         | -1,09                 | 0,07                          |
| RRP12-like protein                                                         | Q6P5B0     | Rrp12     | -0,85                 | -0,28                         | -0,86                 | 0,02                          |
| Protein diaphanous homolog 1                                               | E9PV41     | Diap1     | -0,85                 | 0,31                          | -0,72                 | 0,27                          |
| Transferrin receptor protein 1                                             | Q62351     | Tfrc      | -0,84                 | 1,36                          | -0,85                 | 1,84                          |
| C-1-tetrahydrofolate synthase, cytoplasmic                                 | F6YW06     | Mthfd1    | -0,83                 | 0,01                          | -0,88                 | 0,09                          |
| Superkiller viralicidic activity 2-like 2                                  | Q9CZU3     | Skiv2l2   | -0,82                 | 0,02                          | -0,68                 | -0,38                         |
| Protein DEK                                                                | Q7TNV0     | Dek       | -0,82                 | -0,11                         | -0,90                 | -0,02                         |
| Delta-aminolevulinic acid dehydratase                                      | P10518     | Alad      | -0,82                 | 0,31                          | -0,79                 | 0,26                          |
| Dihydrofolate reductase                                                    | P00375     | Dhfr      | -0,80                 | 0,12                          | -1,61                 | 0,02                          |
| Ubiquitin carboxyl-terminal hydrolase isozyme L5                           | Q9WUP7     | Uchl5     | -0,79                 | 0,17                          | -0,61                 | 0,20                          |
| Lysine-specific demethylase 3B                                             | B9EKS2     | Kdm3b     | -0,77                 | -0,17                         | -0,76                 | -0,13                         |
| Pyruvate carboxylase                                                       | E9QPD7     | Pcx;Pc    | -0,76                 | 0,17                          | -0,75                 | -0,22                         |
| Cordon-bleu protein-like 1                                                 | E9QPU9     | Cobll1    | -0,76                 | -0,10                         | -0,59                 | 0,01                          |
| L-lactate dehydrogenase A chain dehydrogenase                              | P06151     | Ldha      | -0,73                 | 0,06                          | -0,83                 | 0,38                          |
| Epithelial splicing regulatory protein 1                                   | F8WGU3     | Esrp1     | -0,73                 | -0,28                         | -0,62                 | -0,34                         |
| Sickle tail protein                                                        | E9QAU4     | Etl4;Skt  | -0,73                 | -0,09                         | -1,07                 | -0,11                         |
| General transcription factor II-I                                          | Q9ESZ8     | Gtf2i     | -0,72                 | 0,06                          | -0,69                 | -0,01                         |
|                                                                            | E9Q4Z2     | Acacb     | -0,71                 | 0,27                          | -1,04                 | 0,67                          |
| 40S ribosomal protein S15                                                  | P62843     | Rps15     | -0,70                 | -0,13                         | -0,86                 | 0,08                          |
| Pre-rRNA-processing protein TSR1 homolog                                   | Q5SWD9     | Tsr1      | -0,70                 | 0,00                          | -1,39                 | 0,09                          |
| Monocarboxylate transporter 1                                              | P53986     | Slc16a1   | -0,70                 | 0,00                          | -0,60                 | 0,05                          |

| Protein name                                                       | Protein ID | Gene name | E1                                 |                                          | E2                                 |                                          |
|--------------------------------------------------------------------|------------|-----------|------------------------------------|------------------------------------------|------------------------------------|------------------------------------------|
|                                                                    |            |           | log <sub>2</sub> FC (TGFβ-1/untr.) | log <sub>2</sub> FC (TGFβ-1/TGFβ-1+E64d) | log <sub>2</sub> FC (TGFβ-1/untr.) | log <sub>2</sub> FC (TGFβ-1/TGFβ-1+E64d) |
| Ubiquitin-like protein 4A                                          | P21126     | Ubl4a     | -0,68                              | 0,24                                     | -0,63                              | 0,42                                     |
| Ribosomal RNA processing protein 1 homolog A                       | P56183     | Rrp1      | -0,67                              | -0,14                                    | -0,70                              | -0,40                                    |
| Far upstream element-binding protein 1                             | Q91WJ8     | Fubp1     | -0,67                              | -0,05                                    | -0,89                              | -0,11                                    |
| Fatty acid-binding protein, epidermal                              | Q05816     | Fabp5     | -0,66                              | 0,23                                     | -0,71                              | 0,28                                     |
| Glyoxylate reductase/hydroxypyruvate reductase                     | Q91Z53     | Grhpr     | -0,65                              | 0,19                                     | -0,75                              | 0,06                                     |
| Choline dehydrogenase, mitochondrial                               | Q8BJ64     | Chdh      | -0,64                              | -0,01                                    | -1,23                              | 0,74                                     |
| Perilipin-3                                                        | Q9DBG5     | Plin3     | -0,64                              | 0,45                                     | -0,73                              | 0,23                                     |
| Acidic leucine-rich nuclear phosphoprotein 32 family member B      | E9QKP8     | Anp32b    | -0,64                              | -0,06                                    | -0,77                              | -0,05                                    |
| Microsomal glutathione S-transferase 1                             | E9QJW0     | Mgst1     | -0,63                              | 0,24                                     | -0,60                              | 0,16                                     |
| Aldehyde dehydrogenase                                             | B1ATI0     | Aldh3a2   | -0,63                              | 0,09                                     | -0,83                              | 0,24                                     |
| 40S ribosomal protein S27                                          | Q6ZWU9     | Rps27     | -0,63                              | -0,43                                    | -0,67                              | -0,18                                    |
| D-3-phosphoglycerate dehydrogenase                                 | Q61753     | Phgdh     | -0,62                              | 0,19                                     | -1,04                              | 0,53                                     |
| Huntingtin                                                         | P42859     | Htt       | -0,62                              | 0,38                                     | -0,64                              | 0,67                                     |
| Valine--tRNA ligase                                                | Q9Z1Q9     | Vars      | -0,61                              | -0,03                                    | -0,75                              | 0,21                                     |
| Sister chromatid cohesion protein PDS5 homolog B                   | F8WHU5     | Pds5b     | -0,61                              | -0,17                                    | -0,87                              | -0,36                                    |
| Treacle protein                                                    | O08784     | Tcof1     | -0,61                              | 0,21                                     | -0,62                              | -0,01                                    |
| Adenylosuccinate synthetase isozyme 2                              | P46664     | Adss      | -0,61                              | -0,04                                    | -0,60                              | -0,30                                    |
| Heat shock protein 105 kDa                                         | Q61699     | Hsph1     | -0,60                              | 0,06                                     | -0,69                              | 0,28                                     |
| Lamina-associated polypeptide 2, isoforms beta/delta/epsilon/gamma | Q61029     | Tmpo      | -0,60                              | 0,03                                     | -0,72                              | -0,03                                    |
| 28 kDa heat- and acid-stable phosphoprotein                        | Q3UHX2     | Pdap1     | -0,60                              | 0,10                                     | -0,60                              | -0,06                                    |
| Importin-4                                                         | Q8VI75     | Ipo4      | -0,59                              | 0,11                                     | -0,66                              | 0,15                                     |
| Leucine-rich repeat-containing protein 16A                         | D3Z024     | Lrrc16a   | -0,59                              | -0,20                                    | -0,59                              | -0,40                                    |
| E3 ubiquitin-protein ligase UBR5                                   | E9Q2H1     | Ubr5      | -0,59                              | 0,05                                     | -0,72                              | -0,02                                    |
| Myb-binding protein 1A                                             | Q7TPV4     | Mybbp1a   | -0,59                              | -0,21                                    | -0,87                              | -0,08                                    |
| Structural maintenance of chromosomes protein 1A                   | Q9CU62     | Smc1a     | -0,58                              | -0,15                                    | -0,75                              | -0,13                                    |

**Table S1: List of all proteins with lower abundance upon TGFβ-1 treatment of iPL32 cells identified in the quantitative proteome comparison:** All proteins with log<sub>2</sub> fold change (FC) ratios TGFβ-1/untreated ≤ - 0.58 (highlighted in grey) in both experiment 1 “E1”

- Supplementary Information Table S1 -

and experiment 2 "E2" are shown with proteins most altered on top. The respective  $\log_2$  FC ratios TGF $\beta$ -1/TGF $\beta$ -1+E64d are also shown.
