# Supplementary material for: Lysosomal protein turnover contributes to the acquisition of TGFβ-1 induced invasive properties of mammary cancer cells
Source: Springer Nature journal article supplement (doi:10.1186/s12943-015-0313-5), 2015-02-15
Supplement: MOESM4 [file 9762972]

- Supplementary Information Table S2 -

Proteins more abundant upon TGFβ-1 treatment

| Protein name                                             | Protein ID | Gene name | E1                                  |                                           | E2                                  |                                           |
|----------------------------------------------------------|------------|-----------|-------------------------------------|-------------------------------------------|-------------------------------------|-------------------------------------------|
|                                                          |            |           | log <sub>2</sub> FC (TGFβ-1 /untr.) | log <sub>2</sub> FC (TGFβ-1 /TGFβ-1+E64d) | log <sub>2</sub> FC (TGFβ-1 /untr.) | log <sub>2</sub> FC (TGFβ-1 /TGFβ-1+E64d) |
| Collagen alpha-2(V) chain                                | Q3U962     | Col5a2    | 3,61                                | -0,31                                     | 3,32                                | -0,08                                     |
| Clusterin                                                | Q06890     | Clu       | 3,60                                | 0,07                                      | 3,10                                | -0,18                                     |
| Transgelin                                               | P37804     | Tagln     | 3,51                                | -0,61                                     | 2,47                                | 0,36                                      |
| Vimentin                                                 | P20152     | Vim       | 3,43                                | -1,00                                     | 1,64                                | 1,84                                      |
| Collagen alpha-1(XII) chain                              | Q60847     | Col12a1   | 3,04                                | -1,16                                     | 2,32                                | -0,65                                     |
| Cysteine and glycine-rich protein 2                      | P97314     | Csrp2     | 2,93                                | -0,40                                     | 2,98                                | -0,91                                     |
| Erythrocyte band 7 integral membrane protein             | P54116     | Stom      | 2,92                                | 0,56                                      | 0,74                                | 0,52                                      |
| Collagen alpha-1(XI) chain                               | Q61245     | Col11a1   | 2,66                                | -0,91                                     | 1,95                                | -0,17                                     |
| Protein Fat1                                             | F2Z4A3     | Fat1      | 2,53                                | -0,51                                     | 2,38                                | -0,62                                     |
| Drebrin                                                  | Q9QXS6     | Dbn1      | 2,49                                | -0,42                                     | 2,82                                | -0,56                                     |
| Tenascin                                                 | Q80YX1     | Tnc       | 2,44                                | -0,45                                     | 2,16                                | -0,11                                     |
| Neural cell adhesion molecule 1                          | P13595     | Ncam1     | 2,44                                | -0,22                                     | 2,15                                | -0,34                                     |
| Immunity-related GTPase family M protein 1               | Q60766     | Irgm1     | 2,31                                | -0,51                                     | 1,25                                | 0,18                                      |
| Cytoskeleton-associated protein 4                        | Q8BMK4     | Ckap4     | 2,07                                | -0,28                                     | 2,07                                | 0,09                                      |
| 5-nucleotidase                                           | Q61503     | Nt5e      | 1,95                                | 0,67                                      | 1,73                                | 0,60                                      |
| Integrin alpha-V                                         | P43406     | Itgav     | 1,89                                | 0,05                                      | 1,91                                | -0,08                                     |
| Cell surface glycoprotein MUC18                          | Q8R2Y2     | Mcam      | 1,81                                | -0,38                                     | 1,99                                | -0,45                                     |
| Adenylate kinase isoenzyme 1                             | Q9R0Y5     | Ak1       | 1,80                                | 0,05                                      | 1,67                                | 0,27                                      |
| Integrin beta;Integrin beta-5                            | Q6PE70     | Itgb5     | 1,77                                | 0,00                                      | 1,84                                | -0,60                                     |
| Syndecan-1                                               | P18828     | Sdc1      | 1,75                                | -0,19                                     | 1,41                                | 0,32                                      |
| Voltage-dependent anion-selective channel protein 3      | Q60931     | Vdac3     | 1,75                                | 0,00                                      | 1,09                                | -0,09                                     |
| Protein Myl12a                                           | Q6ZWQ9     | Myl12a    | 1,74                                | -0,27                                     | 1,87                                | -0,23                                     |
| Latent-transforming growth factor beta-binding protein 2 | O08999     | Ltbp2     | 1,73                                | -0,31                                     | 2,44                                | -0,75                                     |
| Integrin alpha-2                                         | Q62469     | Itga2     | 1,54                                | 0,32                                      | 1,97                                | 0,15                                      |
| Prolyl 4-hydroxylase subunit alpha-1                     | Q60715     | P4ha1     | 1,48                                | -0,43                                     | 1,87                                | -0,34                                     |
| Voltage-dependent anion-selective channel protein 2      | Q60930     | Vdac2     | 1,47                                | 0,16                                      | 1,07                                | 0,06                                      |
| Protein Ahnak2                                           | E9PYB0     | Ahnak2    | 1,47                                | 0,36                                      | 1,73                                | 0,50                                      |
| 14-3-3 protein sigma                                     | O70456     | Sfn       | 1,46                                | -0,09                                     | 0,94                                | 0,37                                      |
| Creatine kinase B-type                                   | Q04447     | Ckb       | 1,45                                | -0,23                                     | 1,82                                | -0,69                                     |
| Cytochrome c oxidase subunit 7A2, mitochondrial          | P48771     | Cox7a2    | 1,42                                | -0,04                                     | 1,03                                | -0,12                                     |
| Tubulin alpha-1A chain                                   | P68369     | Tuba1a    | 1,41                                | -0,08                                     | 1,45                                | -0,05                                     |
| Voltage-dependent anion-selective channel protein 1      | Q60932     | Vdac1     | 1,40                                | -0,02                                     | 1,05                                | -0,09                                     |
| Latexin                                                  | P70202     | Lxn       | 1,38                                | -0,37                                     | 1,63                                | -0,53                                     |

- Supplementary Information Table S2 -

| Protein name                                              | Protein ID | Gene name | E1                                  |                                           | E2                                  |                                           |
|-----------------------------------------------------------|------------|-----------|-------------------------------------|-------------------------------------------|-------------------------------------|-------------------------------------------|
|                                                           |            |           | log <sub>2</sub> FC (TGFB-1 /untr.) | log <sub>2</sub> FC (TGFB-1 /TGFB-1+E64d) | log <sub>2</sub> FC (TGFB-1 /untr.) | log <sub>2</sub> FC (TGFB-1 /TGFB-1+E64d) |
| N(4)-(beta-N-acetylglucosaminy)-L-asparaginase            | Q64191     | Aga       | 1,38                                | 0,37                                      | 1,16                                | -0,07                                     |
| Coactosin-like protein                                    | Q9CQI6     | Cotl1     | 1,33                                | 0,02                                      | 1,77                                | -0,48                                     |
| Cytochrome c oxidase subunit 6B1                          | P56391     | Cox6b1    | 1,30                                | -0,05                                     | 0,88                                | -0,24                                     |
| Cadherin-2                                                | P15116     | Cdh2      | 1,28                                | 0,03                                      | 1,02                                | 0,02                                      |
| Cytochrome c oxidase subunit 2                            | P00405     | Mtco2     | 1,27                                | 0,01                                      | 0,96                                | -0,21                                     |
| Calponin-3                                                | Q9DAW9     | Cnn3      | 1,27                                | -0,23                                     | 1,41                                | -0,49                                     |
| Histone H4                                                | P62806     | Hist1h4a  | 1,26                                | -0,19                                     | 1,76                                | 0,37                                      |
| Tropomyosin alpha-1 chain                                 | E9Q450     | Tpm1      | 1,25                                | -0,25                                     | 0,92                                | -0,31                                     |
| Cytochrome c oxidase subunit 4 isoform 1, mitochondrial   | P19783     | Cox4i1    | 1,24                                | -0,07                                     | 0,89                                | -0,17                                     |
| Calponin-2                                                | Q08093     | Cnn2      | 1,23                                | -0,26                                     | 1,50                                | -0,49                                     |
| Histone H3.1                                              | E9PV77     | H3f3a     | 1,22                                | -0,07                                     | 1,46                                | 0,46                                      |
| Cytochrome c oxidase subunit 5A, mitochondrial            | P12787     | Cox5a     | 1,22                                | 0,02                                      | 1,01                                | -0,22                                     |
| Prolow-density lipoprotein receptor-related protein 1     | Q91ZX7     | Lrp1      | 1,20                                | -0,17                                     | 1,48                                | 0,10                                      |
| Ferritin light chain 1                                    | P29391     | Ftl1;Ftl2 | 1,20                                | 2,87                                      | 2,28                                | 0,96                                      |
| Unconventional myosin-Ib                                  | Q7TQD7     | Myo1b     | 1,19                                | -0,26                                     | 1,48                                | -0,07                                     |
| N-acetylglucosamine-6-sulfatase                           | Q8BFR4     | Gns       | 1,18                                | 1,45                                      | 1,18                                | 0,85                                      |
| Fermitin family homolog 1                                 | P59113     | Fermt1    | 1,16                                | -0,16                                     | 1,22                                | -0,29                                     |
| Mitochondrial carrier homolog 1                           | Q791T5     | Mtch1     | 1,15                                | 0,21                                      | 1,05                                | -0,21                                     |
| Myosin-9                                                  | Q8VDD5     | Myh9      | 1,14                                | -0,64                                     | 0,90                                | 0,46                                      |
| Thrombospondin-1                                          | Q80YQ1     | Thbs1     | 1,13                                | -0,38                                     | 0,91                                | -0,24                                     |
| Cathepsin D                                               | P18242     | Ctsd      | 1,12                                | 0,90                                      | 1,27                                | 0,90                                      |
| Phospholipase D3                                          | O35405     | Pld3      | 1,12                                | 1,40                                      | 0,91                                | 1,59                                      |
| Sodium- and chloride-dependent taurine transporter        | O35316     | Slc6a6    | 1,11                                | 0,36                                      | 1,15                                | 0,08                                      |
| Actin, alpha cardiac muscle 1 muscle                      | P68033     | Actc1     | 1,10                                | -0,19                                     | 1,04                                | -0,40                                     |
| Palladin                                                  | Q9ET54     | Palld     | 1,09                                | -0,17                                     | 1,09                                | 0,09                                      |
| Protein Cald1                                             | E9QA15     | Cald1     | 1,08                                | -0,26                                     | 1,16                                | -0,27                                     |
| Tropomyosin alpha-3 chain                                 | E9Q5J9     | Tpm3      | 1,07                                | -0,03                                     | 1,17                                | -0,29                                     |
| Histone H2A.x;Histone H2A type 2-B                        | P27661     | H2afx     | 1,04                                | -0,57                                     | 0,90                                | -0,45                                     |
| Putative sodium-coupled neutral amino acid transporter 10 | Q5I012     | Slc38a10  | 1,03                                | -0,34                                     | 1,35                                | -0,34                                     |
| Serpin H1                                                 | P19324     | Serpinh1  | 1,03                                | -0,38                                     | 0,63                                | -0,07                                     |
| Ras-related protein R-Ras                                 | P10833     | Rras      | 1,03                                | -0,27                                     | 0,72                                | -0,29                                     |
| Xaa-Pro dipeptidase                                       | Q11136     | Pepd      | 1,02                                | 0,24                                      | 1,04                                | 0,05                                      |
| Retinol-binding protein 1                                 | Q00915     | Rbp1      | 1,02                                | -0,21                                     | 1,64                                | -1,10                                     |
| TSC22 domain family protein 1                             | E9QLZ1     | Tsc22d1   | 1,02                                | -0,02                                     | 1,39                                | -0,36                                     |
| Glutamate--cysteine ligase catalytic subunit              | P97494     | Gclc      | 1,01                                | -0,18                                     | 1,21                                | -0,37                                     |

- Supplementary Information Table S2 -

| Protein name                                                         | Protein ID | Gene name | E1                                  |                                           | E2                                  |                                           |
|----------------------------------------------------------------------|------------|-----------|-------------------------------------|-------------------------------------------|-------------------------------------|-------------------------------------------|
|                                                                      |            |           | log <sub>2</sub> FC (TGFB-1 /untr.) | log <sub>2</sub> FC (TGFB-1 /TGFB-1+E64d) | log <sub>2</sub> FC (TGFB-1 /untr.) | log <sub>2</sub> FC (TGFB-1 /TGFB-1+E64d) |
| Tropomyosin alpha-3 chain                                            | E9Q7Q3     | Tpm3      | 1,01                                | -0,03                                     | 1,11                                | -0,24                                     |
| PDZ and LIM domain protein 7                                         | Q3TJD7     | Pdlim7    | 1,00                                | -0,25                                     | 0,73                                | -0,29                                     |
| OX-2 membrane glycoprotein                                           | O54901     | Cd200     | 0,99                                | 0,04                                      | 0,78                                | -0,20                                     |
| Histone H2A type 1                                                   | P22752     | Hist1h2ab | 0,99                                | -0,38                                     | 1,07                                | -0,15                                     |
| Microtubule-associated protein 4                                     | P27546     | Map4      | 0,97                                | -0,10                                     | 0,84                                | -0,05                                     |
| Niemann-Pick C1 protein                                              | O35604     | Npc1      | 0,96                                | 1,04                                      | 0,74                                | 0,78                                      |
| L-lactate dehydrogenase B chain                                      | P16125     | Ldhb      | 0,93                                | -0,09                                     | 0,83                                | -0,12                                     |
| Transmembrane protein 43                                             | Q9DBS1     | Tmem43    | 0,93                                | -0,20                                     | 0,73                                | -0,06                                     |
| Glutathione S-transferase omega-1                                    | O09131     | Gsto1     | 0,93                                | -1,26                                     | 0,92                                | -1,39                                     |
| Histone H2B                                                          | Q921L4     | Hist1h    | 0,92                                | -0,16                                     | 1,06                                | 0,11                                      |
| Putative phospholipase B-like 2                                      | Q3TCN2     | Plbd2     | 0,91                                | 1,22                                      | 1,06                                | 0,93                                      |
| Malectin                                                             | D3Z1M3     | Mlec      | 0,91                                | -0,24                                     | 0,66                                | -0,12                                     |
| Sideroflexin-3                                                       | Q91V61     | Sfxn3     | 0,90                                | -0,10                                     | 0,98                                | -0,32                                     |
| Protein FAM3C                                                        | Q91VU0     | Fam3c     | 0,89                                | 0,17                                      | 1,20                                | 0,08                                      |
| Bcl-2 homologous antagonist/killer                                   | O08734     | Bak1      | 0,86                                | 0,11                                      | 0,69                                | -0,15                                     |
| Histone H2A.Z                                                        | P0C0S6     | H2afz     | 0,85                                | -0,07                                     | 0,87                                | 0,11                                      |
| Leucyl-cystinyl aminopeptidase                                       | Q8C129     | Lnpep     | 0,84                                | 1,40                                      | 0,77                                | 1,16                                      |
| Glutathione peroxidase 1                                             | P11352     | Gpx1      | 0,84                                | -0,43                                     | 1,60                                | -1,18                                     |
| Tropomyosin alpha-4 chain                                            | Q6IRU2     | Tpm4      | 0,84                                | -0,08                                     | 0,86                                | -0,16                                     |
| Synaptobrevin homolog YKT6                                           | Q9CQW1     | Ykt6      | 0,84                                | 0,15                                      | 0,82                                | 0,24                                      |
| LIM domain and actin-binding protein 1                               | Q9ERG0     | Lima1     | 0,83                                | -0,20                                     | 1,34                                | -0,14                                     |
| Unconventional myosin-Ic                                             | Q9WTI7     | Myo1c     | 0,83                                | -0,07                                     | 1,61                                | -0,05                                     |
| Band 4.1-like protein 2                                              | O70318     | Epb41l2   | 0,82                                | -0,03                                     | 0,62                                | -0,40                                     |
| ER lumen protein retaining receptor 2                                | Q9CQM2     | Kdelr2    | 0,82                                | 0,17                                      | 0,70                                | 0,02                                      |
| Cysteine-rich protein 2                                              | Q9DCT8     | Crip2     | 0,79                                | -0,50                                     | 0,72                                | -0,63                                     |
| Glutamate dehydrogenase 1, mitochondrial                             | P26443     | Glud1     | 0,79                                | -0,09                                     | 0,74                                | -0,19                                     |
| Zyxin                                                                | Q62523     | Zyx       | 0,78                                | -0,08                                     | 0,82                                | -0,29                                     |
| Very long-chain specific acyl-CoA dehydrogenase, mitochondrial       | P50544     | Acadvl    | 0,77                                | -0,19                                     | 0,60                                | -0,26                                     |
| Beta-hexosaminidase subunit beta                                     | P20060     | Hexb      | 0,76                                | 1,02                                      | 1,01                                | -0,02                                     |
| Surfeit locus protein 4                                              | Q64310     | Surf4     | 0,76                                | -0,06                                     | 0,70                                | -0,20                                     |
| NADH dehydrogenase [ubiquinone] iron-sulfur protein 7, mitochondrial | Q9DC70     | Ndufs7    | 0,75                                | -0,09                                     | 0,68                                | -0,37                                     |
| Sulfated glycoprotein 1                                              | Q61207     | Psap      | 0,75                                | 0,48                                      | 1,01                                | 0,41                                      |
| Prenylcysteine oxidase                                               | Q9CQF9     | Pcyox1    | 0,74                                | 0,35                                      | 1,01                                | 0,26                                      |
| Vesicle-trafficking protein SEC22b                                   | O08547     | Sec22b    | 0,74                                | -0,06                                     | 0,75                                | -0,07                                     |
| Inositol 1,4,5-trisphosphate receptor type 3                         | P70227     | Itpr3     | 0,74                                | 0,36                                      | 0,79                                | 0,18                                      |
| Integrin beta-1                                                      | P09055     | Itgb1     | 0,74                                | 0,23                                      | 0,69                                | 0,23                                      |
| Solute carrier family 25                                             | Q8JZU2     | Slc25a1   | 0,73                                | 0,13                                      | 0,75                                | -0,06                                     |

| Protein name                                          | Protein ID | Gene name | E1                                  |                                           | E2                                  |                                           |
|-------------------------------------------------------|------------|-----------|-------------------------------------|-------------------------------------------|-------------------------------------|-------------------------------------------|
|                                                       |            |           | log <sub>2</sub> FC (TGFβ-1 /untr.) | log <sub>2</sub> FC (TGFβ-1 /TGFβ-1+E64d) | log <sub>2</sub> FC (TGFβ-1 /untr.) | log <sub>2</sub> FC (TGFβ-1 /TGFβ-1+E64d) |
| Alpha-actinin-1                                       | Q7TPR4     | Actn1     | 0,72                                | -0,09                                     | 0,90                                | -0,19                                     |
| Galectin-1                                            | P16045     | Lgals1    | 0,72                                | 0,03                                      | 1,23                                | -0,37                                     |
| Cytosolic phospholipase A2                            | P47713     | Pla2g4a   | 0,71                                | -0,41                                     | 1,50                                | -0,97                                     |
| Calpain-2 catalytic subunit                           | O08529     | Capn2     | 0,69                                | 0,01                                      | 0,67                                | -0,04                                     |
| 14-3-3 protein gamma                                  | P61982     | Ywhag     | 0,69                                | 0,00                                      | 0,60                                | 0,07                                      |
| Ribosome-binding protein 1                            | Q99PL5     | Rrbp1     | 0,69                                | -0,13                                     | 0,88                                | -0,08                                     |
| Delta-1-pyrroline-5-carboxylate synthase              | Q9Z110     | Aldh18a1  | 0,67                                | -0,17                                     | 0,59                                | -0,32                                     |
| Integrin beta-6                                       | Q9Z0T9     | Itgb6     | 0,67                                | 0,45                                      | 0,80                                | 0,37                                      |
| Supervillin                                           | E9PVA9     | Svil      | 0,65                                | -0,34                                     | 0,60                                | -0,42                                     |
| Thioredoxin domain-containing protein 5               | Q91W90     | Txndc5    | 0,64                                | -0,13                                     | 0,62                                | -0,04                                     |
| Calcium-binding mitochondrial carrier protein SCaMC-1 | Q8BMD8     | Slc25a24  | 0,63                                | 0,00                                      | 0,85                                | -0,31                                     |
| Rab GDP dissociation inhibitor alpha                  | P50396     | Gdi1      | 0,63                                | -0,03                                     | 1,01                                | -0,12                                     |
| Ladinin-1                                             | P57016     | Lad1      | 0,59                                | 0,10                                      | 0,63                                | 0,00                                      |
| ELAV-like protein 1                                   | P70372     | Elavl1    | 0,58                                | -0,11                                     | 0,66                                | 0,23                                      |
| Protein Utrn                                          | E9Q6R7     | Utrn      | 0,58                                | -0,17                                     | 0,68                                | -0,15                                     |

**Table S2: List of all proteins with higher abundance upon TGFβ-1 treatment of iPL32 identified in the quantitative proteome comparison:** All proteins with log<sub>2</sub> fold change (Fc) ratios TGFβ-1/untreated ≥ 0.58 (highlighted in grey) in both experiment1 “E1” and experiment2 “E2” are shown with proteins most altered on top. The respective log<sub>2</sub> FC ratios TGFβ-1/TGFβ-1+E64d are also shown. Lysosomal proteins as determined by KEGG are highlighted in blue.
