# Supplementary material for: Lysosomal protein turnover contributes to the acquisition of TGFβ-1 induced invasive properties of mammary cancer cells
Source: Springer Nature journal article supplement (doi:10.1186/s12943-015-0313-5), 2015-02-15
Supplement: MOESM5 [file 9762972]

- Supplementary Information Table S3 -

Proteins with altered abundance upon E64d treatment

| Protein name                                | Protein ID | Gene name | E1                                  |                                           | E2                                  |                                           |  |
|---------------------------------------------|------------|-----------|-------------------------------------|-------------------------------------------|-------------------------------------|-------------------------------------------|--|
|                                             |            |           | log <sub>2</sub> FC (TGFβ-1 /untr.) | log <sub>2</sub> FC (TGFβ-1 /TGFβ-1+E64d) | log <sub>2</sub> FC (TGFβ-1 /untr.) | log <sub>2</sub> FC (TGFβ-1 /TGFβ-1+E64d) |  |
| less abundant upon E64d treatment:          |            |           |                                     |                                           |                                     |                                           |  |
| Glutathione S-transferase omega-1           | O09131     | Gsto1     | 0.93                                | -1.26                                     | 0.92                                | -1.39                                     |  |
| Heterogeneous nuclear ribonucleoprotein M   | Q9D0E1     | Hnrnpm    | 0.14                                | -0.83                                     | -0.06                               | -1.24                                     |  |
| YLP motif-containing protein 1              | D3YWX2     | Ylpm1     | 0.14                                | -0.86                                     | 0.05                                | -0.98                                     |  |
| ATP-dependent RNA helicase DDX3X            | Q62167     | Ddx3x     | -0.26                               | -0.81                                     | -0.16                               | -0.96                                     |  |
| Probable ATP-dependent RNA helicase DDX5    | Q8BTS0     | Ddx5      | -0.11                               | -0.73                                     | -0.03                               | -0.66                                     |  |
| Collagen alpha-1(XII) chain                 | Q60847     | Col12a1   | 3.04                                | -1.16                                     | 2.32                                | -0.65                                     |  |
| more abundant upon E64d treatment:          |            |           |                                     |                                           |                                     |                                           |  |
| Cathepsin L1                                | P06797     | Ctsl1     | 0.38                                | 3.75                                      | 0.57                                | 2.33                                      |  |
| Ferritin light chain 1                      | P29391     | Ftl1      | 1.20                                | 2.87                                      | 2.28                                | 0.96                                      |  |
| Junctional adhesion molecule A              | O88792     | F11r      | 0.22                                | 2.09                                      | 0.31                                | 1.63                                      |  |
| Amyloid beta A4 protein                     | P12023     | App       | 0.20                                | 2.05                                      | 0.70                                | 1.09                                      |  |
| Acid ceramidase                             | Q9WV54     | Asah1     | 0.51                                | 1.70                                      | 0.46                                | 1.55                                      |  |
| CD63 antigen                                | P41731     | Cd63      | 0.47                                | 1.65                                      | 0.66                                | 1.70                                      |  |
| Dual specificity protein phosphatase 3      | B1AQF4     | Dusp3     | 0.10                                | 1.59                                      | -0.01                               | 0.64                                      |  |
| Lysosomal alpha-glucosidase                 | P70699     | Gaa       | 0.48                                | 1.51                                      | 0.46                                | 1.81                                      |  |
| Lysosome-associated membrane glycoprotein 2 | P17047     | Lamp2     | 0.41                                | 1.49                                      | 0.51                                | 1.23                                      |  |
| Lysosome-associated membrane glycoprotein 1 | P11438     | Lamp1     | 0.42                                | 1.49                                      | 0.28                                | 1.36                                      |  |
| N-acetylglucosamine-6-sulfatase             | Q8BFR4     | Gns       | 1.18                                | 1.45                                      | 1.18                                | 0.85                                      |  |
| Phospholipase D3                            | O35405     | Pld3      | 1.12                                | 1.40                                      | 0.91                                | 1.59                                      |  |
| Leucyl-cystinyl aminopeptidase              | Q8C129     | Lnpep     | 0.84                                | 1.40                                      | 0.77                                | 1.16                                      |  |
| Transferrin receptor protein 1              | Q62351     | Tfrc      | -0.84                               | 1.36                                      | -0.85                               | 1.84                                      |  |
| Interferon-induced transmembrane protein 2  | Q99J93     | Ifitm2    | 0.52                                | 1.28                                      | 1.10                                | 0.66                                      |  |
| Epididymal secretory protein E1             | Q9Z0J0     | Npc2      | 0.38                                | 1.23                                      | 0.67                                | 0.65                                      |  |
| Putative phospholipase B-like 2             | Q3TCN2     | Plbd2     | 0.91                                | 1.22                                      | 1.06                                | 0.93                                      |  |
| Lysosome membrane protein 2                 | O35114     | Scarb2    | 0.38                                | 1.19                                      | 0.39                                | 0.79                                      |  |
| Cathepsin B                                 | P10605     | Ctsb      | 0.46                                | 1.10                                      | 0.45                                | 0.89                                      |  |
| Bleomycin hydrolase                         | Q8R016     | Blmh      | -0.33                               | 1.07                                      | -0.45                               | 1.28                                      |  |
| Niemann-Pick C1 protein                     | O35604     | Npc1      | 0.96                                | 1.04                                      | 0.74                                | 0.78                                      |  |
| Thioredoxin-related transmembrane protein 1 | Q8VBT0     | Tmx1      | 0.12                                | 1.03                                      | -0.09                               | 1.16                                      |  |
| Cathepsin D                                 | P18242     | Ctsd      | 1.12                                | 0.90                                      | 1.27                                | 0.90                                      |  |
| Galectin-3                                  | P16110     | Lgals3    | -1.38                               | 0.84                                      | -2.29                               | 1.68                                      |  |

| Protein name                                    | Protein ID | Gene name | E1                                  |                                           | E2                                  |                                           |  |
|-------------------------------------------------|------------|-----------|-------------------------------------|-------------------------------------------|-------------------------------------|-------------------------------------------|--|
|                                                 |            |           | log <sub>2</sub> FC (TGFβ-1 /untr.) | log <sub>2</sub> FC (TGFβ-1 /TGFβ-1+E64d) | log <sub>2</sub> FC (TGFβ-1 /untr.) | log <sub>2</sub> FC (TGFβ-1 /TGFβ-1+E64d) |  |
| more abundant upon E64d treatment:              |            |           |                                     |                                           |                                     |                                           |  |
| ADP-ribosylation factor-like protein 8B         | Q9CQW2     | Arl8b     | 0.33                                | 0.82                                      | 0.46                                | 0.72                                      |  |
| Glucosamine-6-phosphate isomerase 1             | O88958     | Gnpda1    | 0.46                                | 0.80                                      | 0.66                                | 0.60                                      |  |
| Ras-related GTP-binding protein D               | B1AWT3     | Rragd     | 0.26                                | 0.78                                      | 0.21                                | 0.63                                      |  |
| Proteasome subunit beta type-7                  | P70195     | Psmb7     | -0.30                               | 0.77                                      | -0.26                               | 0.64                                      |  |
| Synaptic vesicle membrane protein VAT-1 homolog | Q62465     | Vat1      | 0.44                                | 0.76                                      | 0.23                                | 0.83                                      |  |
| V-type proton ATPase subunit E 1                | P50518     | Atp6v1e1  | -0.04                               | 0.73                                      | -0.24                               | 0.72                                      |  |
| Vesicle-associated membrane protein 8           | O70404     | Vamp8     | 0.32                                | 0.68                                      | 0.20                                | 0.99                                      |  |
| V-type proton ATPase catalytic subunit A        | P50516     | Atp6v1a   | -0.06                               | 0.68                                      | -0.29                               | 0.72                                      |  |
| Proteasome subunit beta type-2                  | Q9R1P3     | Psmb2     | -0.18                               | 0.67                                      | -0.20                               | 0.74                                      |  |
| Proteasome subunit beta type-4                  | P99026     | Psmb4     | -0.08                               | 0.67                                      | -0.10                               | 0.75                                      |  |
| Ras-related protein Rab-7a                      | P51150     | Rab7a     | 0.32                                | 0.67                                      | 0.26                                | 0.72                                      |  |
| 5-nucleotidase                                  | Q61503     | Nt5e      | 1.95                                | 0.67                                      | 1.73                                | 0.60                                      |  |
| Inositol monophosphatase 1                      | Q924B0     | Impa1     | -0.12                               | 0.66                                      | -0.27                               | 0.80                                      |  |
| Proteasome subunit alpha type-3                 | O70435     | Psma3     | -0.11                               | 0.64                                      | -0.08                               | 0.73                                      |  |
| Toll-interacting protein                        | Q9QZ06     | Tollip    | -0.07                               | 0.63                                      | -0.10                               | 0.67                                      |  |
| V-type proton ATPase subunit G 1                | Q9CR51     | Atp6v1g1  | -0.02                               | 0.62                                      | -0.16                               | 0.69                                      |  |
| Proteasome subunit beta type-5                  | O55234     | Psmb5     | -0.11                               | 0.62                                      | -0.05                               | 0.64                                      |  |
| Proteasome subunit alpha type-1                 | Q9R1P4     | Psma1     | -0.21                               | 0.62                                      | -0.21                               | 0.85                                      |  |
| Proteasome subunit alpha type-6                 | Q9QUM9     | Psma6     | -0.13                               | 0.62                                      | -0.06                               | 0.69                                      |  |
| Proteasome subunit beta type-3                  | Q9R1P1     | Psmb3     | -0.12                               | 0.62                                      | -0.02                               | 0.60                                      |  |
| Lactadherin                                     | P21956     | Mfge8     | -0.82                               | 0.61                                      | -0.11                               | 0.65                                      |  |
| Ras-related protein Rab-9A                      | A2AFP5     | Rab9      | -0.09                               | 0.60                                      | -0.43                               | 0.74                                      |  |
| V-type proton ATPase subunit B                  | P62814     | Atp6v1b2  | -0.18                               | 0.60                                      | -0.34                               | 0.60                                      |  |
| Nicastrin                                       | F6UF97     | Ncstn     | 0.30                                | 0.59                                      | 0.30                                | 0.66                                      |  |
| Proteasome subunit beta type-6                  | Q60692     | Psmb6     | -0.18                               | 0.59                                      | -0.16                               | 0.69                                      |  |

**Table S3: List of proteins with altered abundance upon cysteine cathepsin inhibition in TGFβ-1 treated iPL32 cells identified in the quantitative proteome comparison:** All proteins at least 50% higher or lower upon E64d treatment (log<sub>2</sub> Fc TGFβ-1/untr. ≤ -0.58 or ≥ 0.58, highlighted in grey) in both experiment 1 “E1” and experiment 2 “E2” are shown. The respective log<sub>2</sub> FC ratios TGFβ-1/untr. are also shown.
